# Supplementary material for: Evaluation of nickel ferrite nanoparticles coated with oleylamine by NMR relaxation measurements and magnetic hyperthermia
Source: Royal Society of Chemistry journal article supplement (doi:10.1039/c3dt52860j), 2013-12-18
Supplement: c3dt52860j.pdf [file c3dt52860j.pdf]

**Evaluation of nickel ferrite nanoparticles coated with oleylamine by NMR  
relaxation measurements and magnetic hyperthermia.**

**M. Menelaou, K. Georgoula, K. Simeonidis, C. Dendrinou-Samara**

C. Dendrinou-Samara (Corresponding author)

Department of Chemistry, Aristotle University of Thessaloniki, 54124 Thessaloniki,  
Greece

e-mail: [samkat@chem.auth.gr](mailto:samkat@chem.auth.gr)

M. Menelaou, K. Georgoula

Department of Chemistry, Aristotle University of Thessaloniki, 54124 Thessaloniki,  
Greece

K. Simeonidis

Department of Mechanical Engineering, School of Engineering, University of  
Thessaly, 38334 Volos, Greece

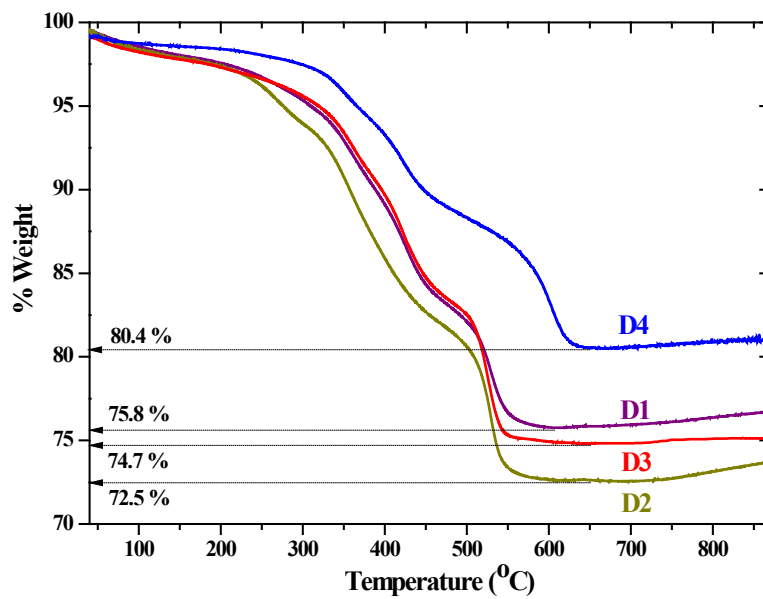

**Fig. S1** Thermogravimetric curves of nickel ferrite nanoparticles D1-D4 showing the relative weight loss attributed to the surfactant removal.

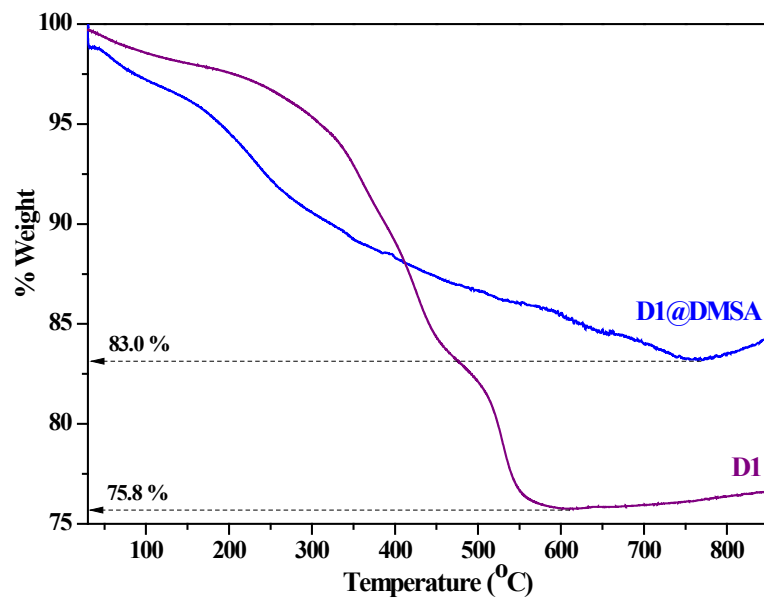

**Fig. S2** Thermogravimetric curves of the as prepared (D1) and functionalized nickel ferrite nanoparticles (D1@DMSA) and the relative weight loss attributed to the surfactant removal.

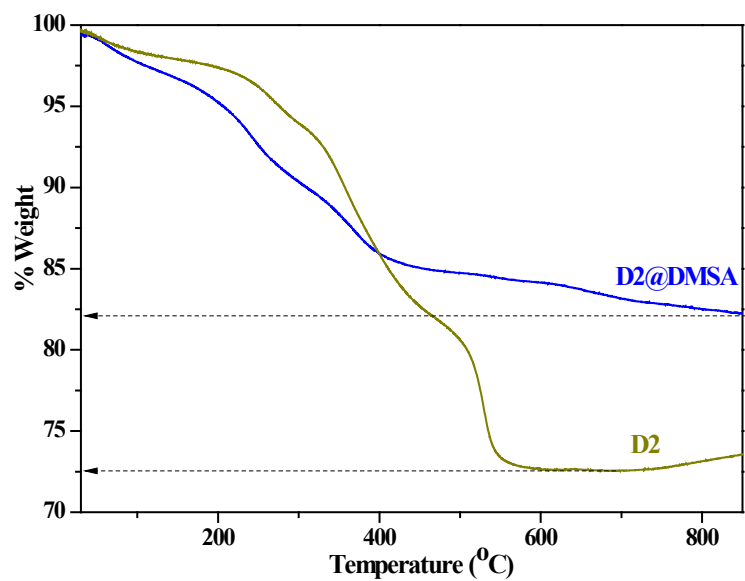

**Fig. S3** Thermogravimetric curves of the as prepared (D2) and functionalized nickel ferrite nanoparticles (D2@DMSA) and the relative weight loss attributed to the surfactant removal.

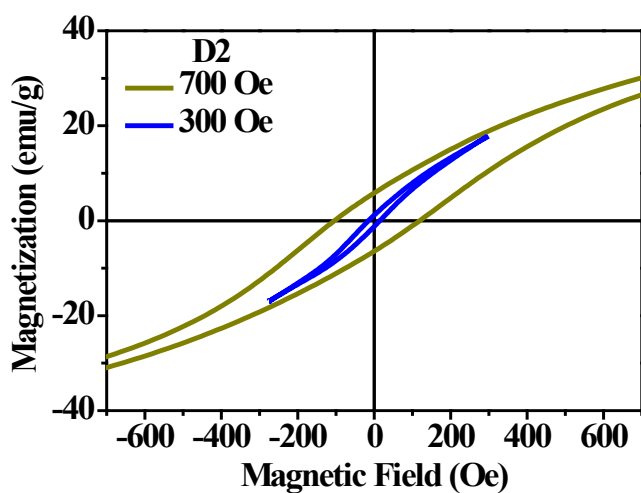

a

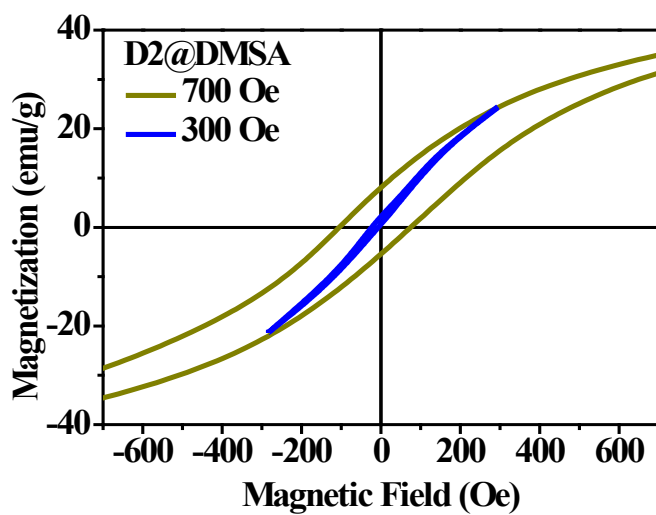

b

**Fig. S4** Magnetic behavior on the effective mass for the samples D2 (a) and D2@DMSA (b) at 300 Oe and 700 Oe.
